# Supplementary material
Source: PubMed Central journal article supplement (PMC6318784)
Supplement: mmc1.pdf [file mmc1.pdf]

**YMTHE, Volume 27**

**Supplemental Information**

**Bioselection Reveals miR-99b and miR-485  
as Enhancers of Adenoviral Oncolysis  
in Pancreatic Cancer**

**Maria Rovira-Rigau, Giulia Raimondi, Miguel Ángel Marín, Meritxell Gironella, Ramon Alemany, and Cristina Fillat**

## Supplemental Data Items:

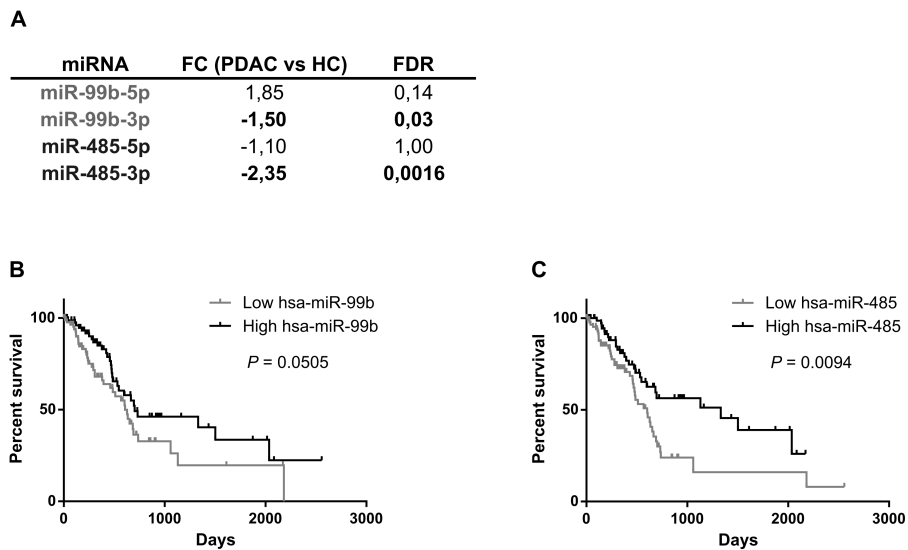

**Figure S1. Overall survival and miR-99b and miR-485 expression correlation in PDAC patients.** (A) Genome-wide miRNA profiling data of miR-99b and miR-485 represented as fold-change expression in PDAC patients ( $n = 11$ ) versus healthy controls ( $n = 3$ ). Differential expression was calculated with R version 2.13.0 using DESeq package 1.4.1 available in Bioconductor version 2.8<sup>1</sup>. Fold change was calculated as the ratio between normalized count data for tumor and normal samples. Significance is considered for miRNAs with a  $FDR < 0.05$ . (B, C) Kaplan-Meier survival curves for patients with low or high miR-99b and miR-485 expression. Data were obtained from the TCGA database (<https://tcga-data.nci.nih.gov>) and divided in low and high miR expression using the median value as a cut-off. Statistical differences were evaluated with a non-parametric log-rank test.

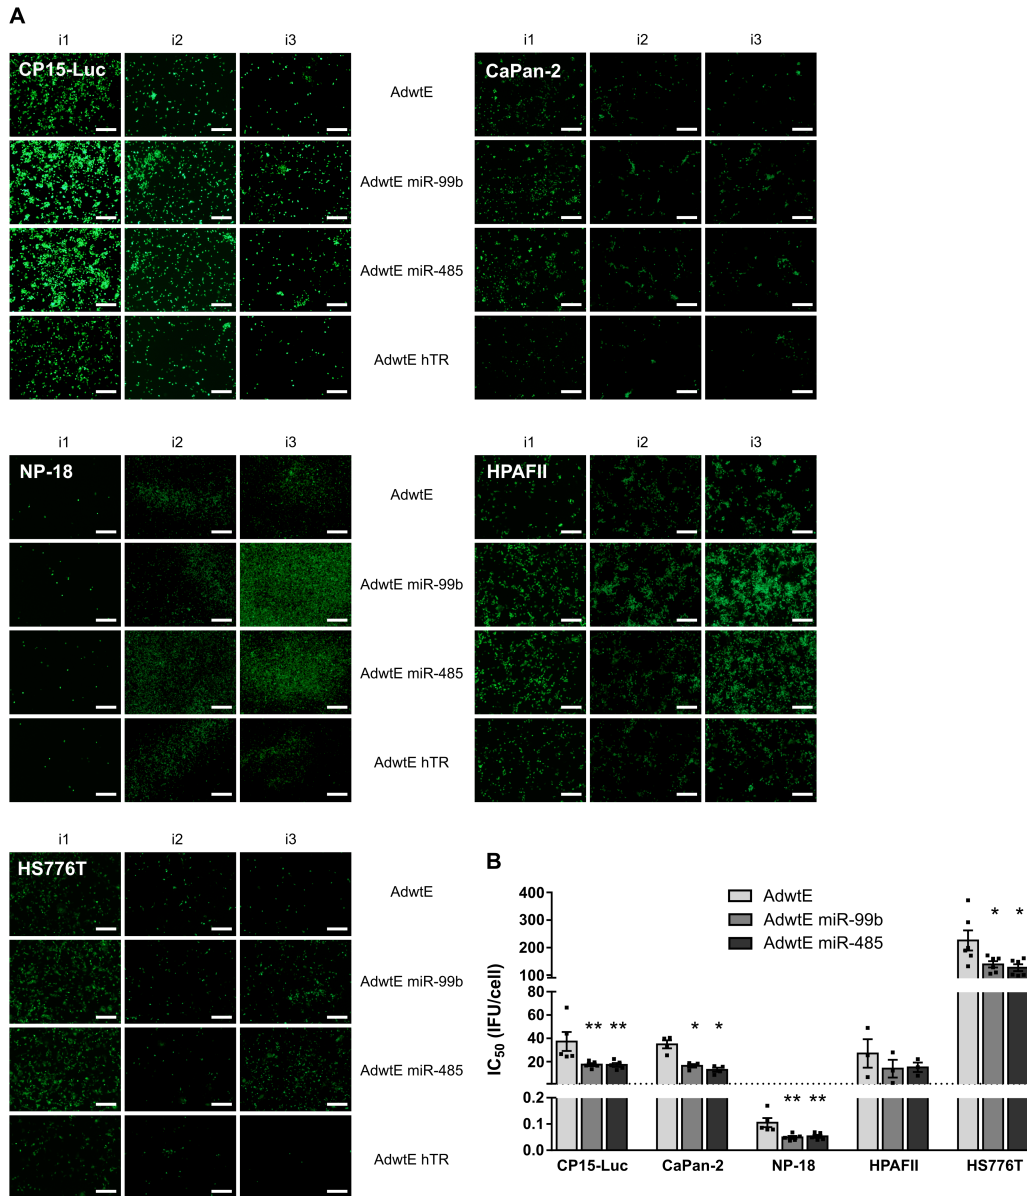

**Figure S2. miR-99b and miR-485 encoding viruses have an increased activity in the patient-derived CP15-Luc and NP-18 cells and in CaPan-2, HPAFII and HS776T cell lines. (A)** Cells were infected with AdwtE, AdwtE miR-99b, AdwtE miR-485, or AdwtE hTR (CP15-Luc, CaPan-2 and HPAFII – 10 IFU/cell; NP-18 – 0,05 IFU/cell; HS776T – 50 IFU/cell). At 48 h PI, virus-containing supernatants were collected and used to infect new cells (CP15-Luc – 50%; CaPan-2 and HS776T – 80%; HPAFII – 20%; NP-18 – 2%). EGFP expression was evaluated at the end of each infection. Representative fluorescent images are presented; original magnification, 4 $\times$ ; scale bar, 200  $\mu$ m. **(B)** *In vitro* oncolytic activity in CP15-Luc, CaPan-2, NP-18, HPAFII and HS776T cells. Cells were seeded in triplicate and infected with a dose range of AdwtE, AdwtE miR-99b, or AdwtE miR-485. Cell viability was measured 7 days PI by MTT assay, and IC<sub>50</sub> values were determined. Data are shown as mean  $\pm$  SEM for at least three independent biological replicates. Significance was assessed by comparison to AdwtE infected cells using a two-tailed Mann-Whitney test. \*P < 0.05, \*\*P < 0.01.

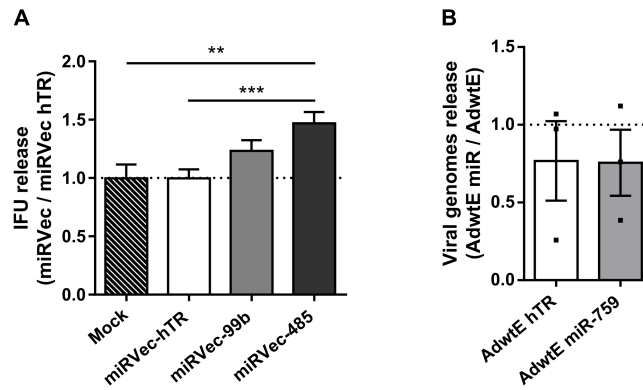

**Figure S3. The increased viral release is specific for miR-99b and miR-485 expression. (A)** Relative infective viral particles release in PANC-1 cells transfected with miRNA expression plasmids by using oligopeptide-modified poly( $\beta$ -amino ester)s. PANC-1 cells were mock transfected or transfected with hTR or miRNA expression plasmids. At 24 h post-transfection, cells were infected with 5 IFU/cell of AdwtE. At 48 h PI, supernatants were collected and titrated by viral infectious units. Dashed line represents miRVec hTR transfected cells values. Data are shown as mean  $\pm$  SEM for at least five independent biological replicates. Significance was assessed using a two-tailed Mann-Whitney test.  $**P < 0.01$ ,  $***P < 0.001$ . **(B)** Viral genomes released in PANC-1 cells. Cells were infected with 1 IFU/cell of AdwtE, AdwtE hTR, or AdwtE miR-759. Supernatants were collected at 48 h PI, and viral genomes were quantified by qPCR. Dashed line represents AdwtE infected cells values. Data are shown as mean  $\pm$  SEM for three independent biological replicates.



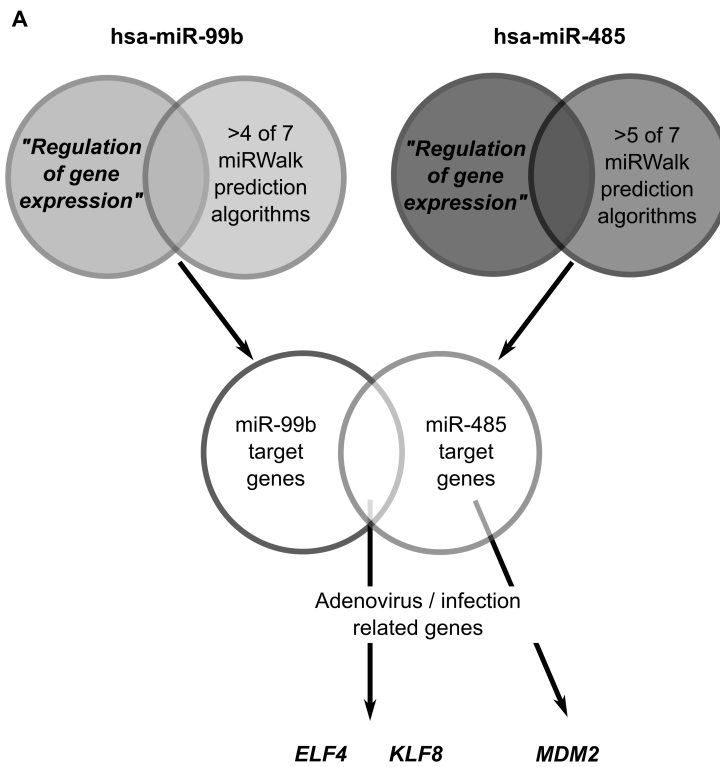

**B**

| Gene        | miR-99b-3p | miR-99b-5p | miR-485-3p | miR-485-5p |
|-------------|------------|------------|------------|------------|
| <i>ELF4</i> | 1          | -          | -          | 1          |
| <i>KLF8</i> | 1          | 1          | 1          | 2          |
| <i>MDM2</i> | -          | -          | 1          | 7          |

**Figure S4. Identification strategy of potential miR-99b and miR-485 target genes. (A)** Bioinformatics analysis to identify potential miR-99b and miR-485 target genes (see Methods for detailed description). **(B)** Predicted target sites for miR-99b and miR-485 at the 3' UTR of the *ELF4*, *KLF8*, and *MDM2* genes.

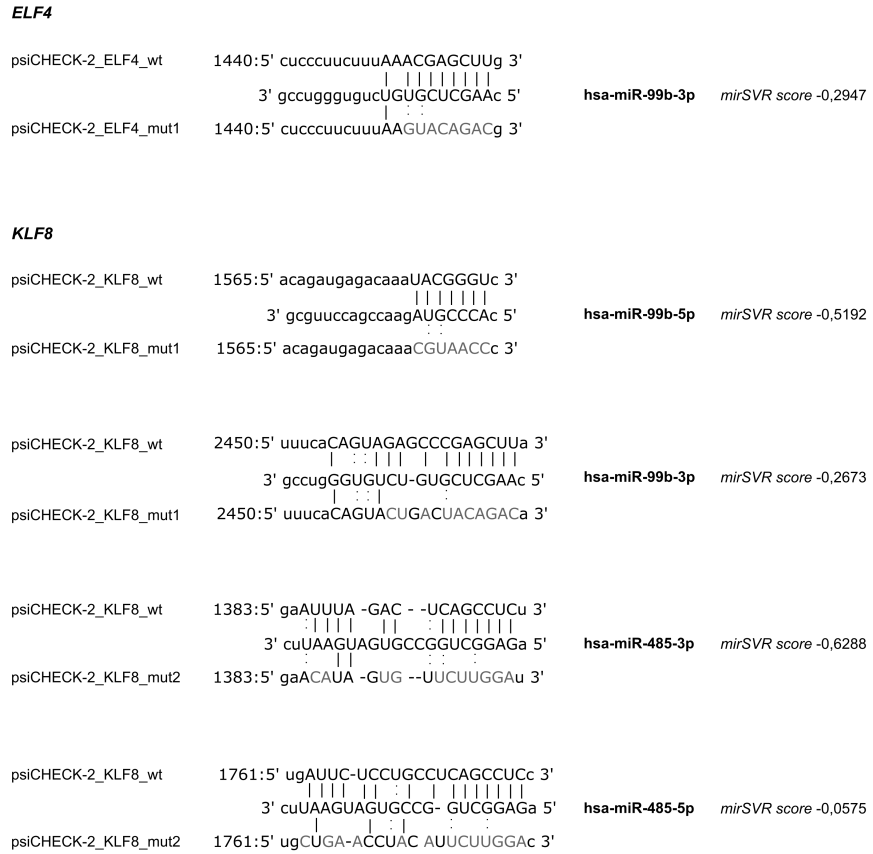

**Figure S5. miR-99b and miR-485 target sites at the 3'UTR of ELF4, MDM2 and KLF8 genes.** Wild type and mutagenized miR-99b and miR-485 target sites present at the 3'UTR of ELF4 and KLF8 genes cloned in the psiCHECK-2 vector for further validation.

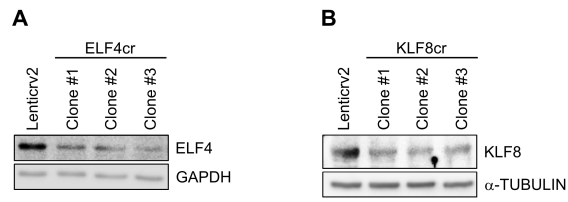

**Figure S6. ELF4 and KLF8 downregulation in CRISPR/Cas9 modified PANC-1 clones. (A, B)** Representative ELF4 and KLF8 western blots of control PANC-1 cells (Lenticrv2) and three CRISPR/Cas9 modified PANC-1 clones.

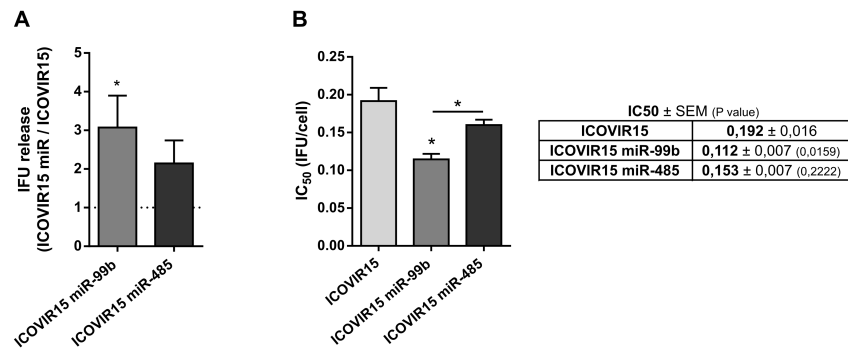

**Figure S7. miR encoding ICOVIR15 viral activity in MIA PaCa-2 cells. (A)** Relative infective viral particles release. MIA PaCa-2 cells were seeded in triplicate and infected with ICOVIR15, ICOVIR15 miR-99b, or ICOVIR15 miR-485 (1 IFU/cell). Supernatants were collected at 48 h PI and titrated by viral infectious units. Dashed line represents ICOVIR15 values. **(B)** *In vitro* oncolytic activity in MIA PaCa-2 cells. Cells were seeded in triplicate and infected with a dose range of ICOVIR15, ICOVIR15 miR-99b, or ICOVIR15 miR-485. Cell viability was measured 7 days PI by MTT assay, and IC<sub>50</sub> values were determined. Data are shown as mean ± SEM for at least five independent biological replicates. Significance was assessed using a two-tailed Mann-Whitney test. \**P* < 0.05.

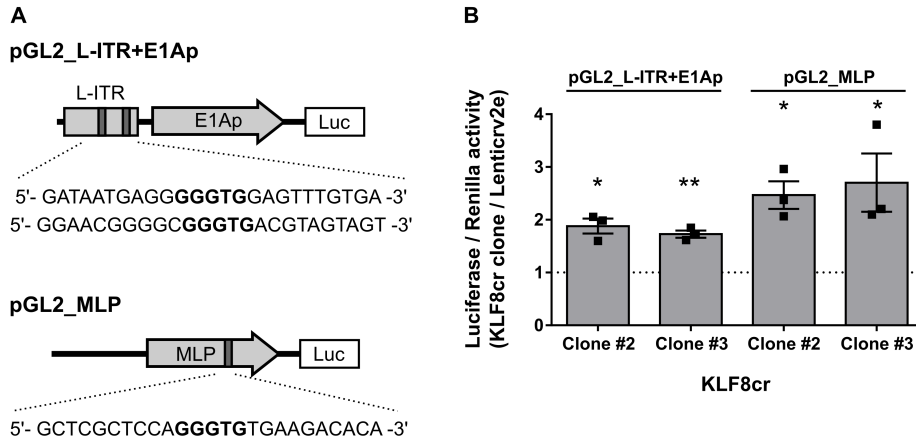

**Figure S8. L-ITR+E1A and MLP transcriptional activation in low KLF8 expressing cells (A)** Schematic diagram of pGL2 reporter vectors containing the L-ITR and E1A promoter regions (pGL2\_L-ITR+E1Ap) or the Major Late Promoter (MLP) region (pGL2\_MLP) controlling the expression of the *Luciferase* gene. The sequences surrounding the GT-boxes (KLF8 binding sites) are shown. **(B)** Control PANC-1 cells (Lenticrv2) and two CRISPR/Cas9 modified PANC-1 clones for KLF8 were co-transfected with pGL2\_L-ITR+E1Ap or pGL2\_MLP luciferase reporter vectors and a pGL4.75 control vector (Renilla gene). Luciferase and Renilla activities were evaluated 48 h post-transfection.

**Table S1. miRNA encoding adenovirus isolated at the end of the bioselection process**

**PANC-1**

| <b>miRNA</b>   | <b>% clones</b> |
|----------------|-----------------|
| <b>miR-99b</b> | <b>7,1</b>      |
| <b>miR-485</b> | <b>28,6</b>     |
| miR-200c       | 21,4            |
| miR-183        | 14,3            |
| miR-324        | 14,3            |
| miR-511        | 7,1             |
| miR-345        | 7,1             |

**MIA PaCa-2**

| <b>miRNA</b>   | <b>% clones</b> |
|----------------|-----------------|
| <b>miR-99b</b> | <b>87,9</b>     |
| <b>miR-485</b> | <b>9,1</b>      |
| miR-142        | 3,0             |

**Table S3. Primers used for adenovirus and reporter plasmids generation**

|   | <b>Name</b>                             | <b>Sequence</b>                                                                                                                                                                  |
|---|-----------------------------------------|----------------------------------------------------------------------------------------------------------------------------------------------------------------------------------|
| 1 | psi-CHECK-2 Fw<br>psi-CHECK-2 Rv        | GCTAAGAAGTTCCTAACACCGAG<br>CGCGTCAGACAAACCCTAACCAC                                                                                                                               |
| 2 | RpsLNeo Fiber Fw<br>RpsLNeo Fiber Rv    | caattggtactaagcgggtgatgtttctgatcagccaccGGCCTGGTGATGATG<br>gacttgaaatttctgcaattgaaaaataaagtttattaTCAGAAGAACTCGTCA                                                                 |
| 3 | Fiber-GFP Fw<br>Fiber-GFP Rv            | caattggtactaagcgggtgatgtttctgatcagccaccATGGTGAGCAAGGGCGAGG<br>gacttgaaatttctgcaattgaaaaataaagtttattaCTTGACAGCTCGTCCATGC                                                          |
| 4 | E4-RpsLNeo Fw<br>E4-RpsLNeo Rv          | gaaaactacaattccaacacatacaagttactccgcctaa <i>gcagtgaaaaaatgctttatttgtgaaatttggatgctattgctttat</i> TCA<br>GAAGAACTCGTCA<br>cgtggcgcggggcgtgggaacggggcgggtgacgtaggttGGCCTGGTGATGATG |
| 5 | E4-miRNA cua 2<br>Fw<br>E4-miRNA cua Rv | gaaaactacaattccaacacatacaagttactccgcctaaCTTTTATTTTATCGAATCTGC<br>cgtggcgcggggcgtgggaacggggcgggtgacgtaggttACATTGATTATTGACTAG                                                      |
| 6 | GFP_seq Fw<br>GFP_seq Rv                | CTGGTCTGGCCACA ACTACA<br>GGAGGTGGCAGGTTGAATAC                                                                                                                                    |
| 7 | Step3/4 Fw<br>Step3/4 Rv                | CCAGAAACGAAAGCCAAAAA<br>TAATGAGGGGGTGGAGTTTG                                                                                                                                     |

Lowercase - homology tails

*Lowercase italics* - polyA sequence

**Table S4. Primers used for qPCR reactions**

| Set | Name           | Sequence                        |
|-----|----------------|---------------------------------|
| 1   | E1A Fw         | ATCGAAGAGGTACTGGCTGA            |
|     | E1A Rv         | TTCCTCCGGTGATAATGACAAGACCTGCAAC |
| 2   | qPCR-Hexon Fw  | GTCTACTTCGTCTTCGTTGTC           |
|     | qPCR-Hexon Rv  | TGGCTTCCACGTACTTTG              |
| 3   | qPCR-Fiber Fw  | CTCCAAGTGTGCCTTTTC              |
|     | qPCR-Fiber Rv  | GGCTCACAGTGGTTACATT             |
| 4   | Hexo01         | GCCGAGTGGTCTTACATGCACATC        |
|     | Hexo02         | CAGCACGCCGCGGATGTCAAAG          |
| 5   | Albumin Fw     | GCTGTCATCTCTTGTTGGGCTGT         |
|     | Albumin Rv     | GGCTATCCAAACTCATGGGAG           |
| 6   | 5' E4 Fw3      | GCCAAGTGCAGAGCGAGTAT            |
|     | Adwt R-ITR Rv2 | CGGGGCGGGTGACGTAGGTTTTA         |
|     | AdmiR-99b Rv   | CTATACGGCCTCCTAGCTTCCGAATTC     |
|     | AdmiR-485 Rv   | CTGGGGCACTACCAACTTTAGGCAATTC    |
| 7   | Elf4 Fw        | TCCTGGATGAGAAGCAGATCTTCA        |
|     | Elf4 Rv        | ATGGTGCTGCCTTTGCCATC            |
| 8   | Klf8 Fw        | TGCTGGATCAGTGAAAGTTGACC         |
|     | Klf8 Rv        | TTTATAAGGCTTCTCTCCTGTATGGATTCTG |
| 9   | Mdm2 Fw        | ACAAGAGACCCTGGTTAGACCAAAG       |
|     | Mdm2 Rv        | CCTGAGTCCGATGATTCCCTGCTG        |
| 10  | Gapdh Fw       | TGTCAAGCTCATTTCTGGTATGA         |
|     | Gapdh Rv       | TTACTCCTTGGAGGCCATGTGGG         |



**Table S5. Antibodies and conditions for western blot analysis**

| <b>Antibody</b>               | <b>Provider</b>          | <b>Reference</b> | <b>Molecular size (KDa)</b> | <b>Dilution</b> | <b>Hybridization conditions</b> |
|-------------------------------|--------------------------|------------------|-----------------------------|-----------------|---------------------------------|
| Adenovirus-2/5 E1A [M73]      | Santa Cruz Biotechnology | sc-25            | 48-54                       | 1/200           | 1h - RT                         |
| Adenovirus type 5 (hexon)     | Abcam                    | ab6982           | 107                         | 1/200           | 1h - RT                         |
| Adenovirus type 5 (penton)    | Abcam                    | ab6982           | 64                          | 1/200           | 1h - RT                         |
| Adenovirus fiber trimer [2A6] | GeneTex                  | GTX23232         | 62                          | 1/200           | 1h - RT                         |
| ELF4 [AB1]                    | Sigma Aldrich            | AV38028          | 71                          | 1/500           | O/N - 4°C                       |
| KLF8                          | Aviva Systems Biology    | ARP32859_P050    | 39                          | 1/1000          | O/N - 4°C                       |
| MDM2 [SM14]                   | Santa Cruz Biotechnology | sc-965           | 90/60                       | 1/200           | O/N - 4°C                       |
| GAPDH                         | Merck Millipore          | ABS16            | 38-40                       | 1/10000         | 1h - RT / O/N -4°C              |
| Tubulin                       | Sigma Aldrich            | T9026            | 50                          | 1/500           | O/N - 4°C                       |

| <b>Secondary antibody</b>                        | <b>Provider</b>             | <b>Reference</b> | <b>Molecular size (KDa)</b> | <b>Dilution</b> | <b>Hybridization conditions</b> |
|--------------------------------------------------|-----------------------------|------------------|-----------------------------|-----------------|---------------------------------|
| Polyclonal Rabbit Anti-Mouse Immunoglobulins HRP | Agilent Technologies (Dako) | P0161            | -                           | 1/2000          | 45 min - RT                     |
| Polyclonal Goat Anti-Rabbit Immunoglobulins HRP  | Agilent Technologies (Dako) | P0160            | -                           | 1/2000          | 45 min - RT                     |

## Supplemental Materials and Methods:

**EGFP fluorescence quantification.** EGFP fluorescence intensity in adenovirus infected cells was quantified from images obtained using the microscope Olympus IX51 (at a wave length of 480 nm) and ImageJ v10.2 software.

**Reporter gene assays.** HEK293T cells were seeded in triplicate ( $4 \times 10^4$  cells/96-well plate); 24 h later, transient transfections were performed using CalPhos Mammalian Transfection Kit (Clontech). About 50 ng of psiCHECK-2\_ELF4\_wt, psiCHECK-2\_ELF4\_mut1, psiCHECK-2\_KLF8\_wt, psiCHECK-2\_KLF8\_mut1, or psiCHECK-2\_KLF8\_mut2 were co-transfected with 100 ng of miRVec control, miRVec-99b, or miRVec-485. Renilla and firefly luciferase activities were measured at 48 h post-transfection using the DualGlo<sup>®</sup> Luciferase Assay (Promega).

**Western blot analysis.** Total protein extracts were obtained using lysis buffer (50 mM Tris-HCl [pH 6.8], 2% SDS, and 10% glycerol) containing 1% Complete Mini Protease Inhibitor (Roche). Lysates were boiled for 10 min at 98°C and centrifuged 5 min at  $16,000 \times g$ . Protein concentration was determined by BCA Protein Assay kit (ThermoFisher Scientific). Forty mg of total protein was resolved in 7.5%–10% SDS-PAGE and transferred to nitrocellulose or PVDF membranes by standard methods. Membranes were blocked with TBS-Tween 10% milk (1 h at room temperature), immunoblotted with the corresponding antibody diluted in TBS-Tween 5% milk (Table S5), rinsed with TBS-Tween, and incubated with HRP-conjugated goat anti-rabbit or rabbit anti-mouse secondary antibodies (1/2000 in TBS-Tween 5% milk, 45 min at room temperature). Antibody labelling was detected by ECL Amersham Prime Western Blotting Detection Reagent (GE Healthcare Life Sciences).

**cDNA synthesis and RT-qPCR of viral and cellular RNA.** Total RNA from tumors and cell cultures was obtained using miRNeasy Mini RNA Extraction Kit (Qiagen). About 500 ng of total RNA was reverse-transcribed to generate cDNA using Moloney murine leukemia virus reverse transcriptase and Oligo dT from PrimeScript RT Reagent Kit (Takara), according to manufacturer's instructions. qPCR reactions were performed on a ViiA7 System using SYBR Green I Master Mix (Roche), using 1 ml of cDNA and primers specific for each reaction (Table S4).

**In vitro cytotoxicity assays.** PANC-1 and MIA PaCa-2 cells were seeded in triplicate ( $5 \times 10^3$  cells/well in 96-well plates) and infected at different viral doses. At 4 h PI, virus-containing medium was replaced with fresh medium. Cell viability was measured at 7 days PI with the MTT colorimetric assay (Affymetrix, USB<sup>®</sup> Products).

**CRISPR/Cas9-modified PANC-1 cells generation.** Single guide RNA sequences targeting *ELF4* and *KLF8* were designed using the CRISPR/Cas9 MIT webtool (<http://crispr.mit.edu/>) in combination with Breaking Cas software (<http://bioinfogp.cnb.csic.es/tools/breakingcas/>). The oligonucleotides containing sgRNAs were synthesized by IDT (Integrated DNA Technologies) and cloned in lenticrv2 plasmid (Addgene #52961) following protocol described by Zheng Lab at MIT (available online at [https://media.addgene.org/data/plasmids/52/52961/52961-attachment\\_B3xTwa0bkYD.pdf](https://media.addgene.org/data/plasmids/52/52961/52961-attachment_B3xTwa0bkYD.pdf)); sgELF4 (exon 3) 5'-CGCGGTTGACATGGTGTGCG-3' and sgKLF8 (exon 3) 5'-TATGACTTCTCCAACACTCC-3'. Plasmids containing sgRNAs were transfected to HEK293T cells together with packaging pCMVAR 8.91 and envelope pVSV plasmids to obtain lentiviral particles. Transduction of PANC-1 cells with these lentiviruses generated pools of cells genetically modified via CRISPR/Cas9 technology. Cells were selected with puromycin (8 µg/ml) for one week, and single cell clones were isolated. Alterations of the genomic sequence were analyzed via Sanger sequencing using the corresponding primers for *ELF4* EX3 (Fw: 5'-GGACTTTGAGGACATCGTGC-3', Rw: 5'-CGGGCTGGCCCTGATTATAG-3') and *KLF8* EX3 (Fw: 5'-GCTTGCATGTCTCTTCAGGG-3', Rw: 5'-CCATCTCCTCAATGAGTGGG-3'). In the selected clones, absence of protein expression was validated by Western blotting.

**Promoter reporter gene assay.** pGL2\_LITR+E1Ap and pGL2\_MLP were generated by cloning the corresponding promoter region (Ad5 L-ITR+E1Ap – 1bp to 559bp, MLP – 5787bp to 6053bp) into a pGL2 vector. Promoter regions were amplified by PCR with primers containing a HindIII restriction site at their 5' end. PCR products were digested with HindIII (Thermo Fisher Scientific) and introduced into the pGL2 vector, digested with the same restriction enzyme. Plasmid constructions were tested by colony PCR and validated by Sanger sequencing. Control PANC-1 cells (Lenticrv2) and two CRISPR/Cas9 modified PANC-1 clones for KLF8 were seeded in triplicate ( $4 \times 10^4$  cells/96-well plate); 24 h later,

transient transfections were performed with Lipofectamine™ 3000 Transfection Reagent (Thermo Fisher Scientific). About 100 ng of pGL2\_LITR+E1Ap and pGL2\_MLP were co-transfected with 50 ng of pGL4.75 vector. Firefly and Renilla activities were measured at 48 h post-transfection.

**Immunofluorescence detection of adenovirus E1A protein in tumors.** OCT-embedded sections of PANC-1 tumors, obtained at the end of the antitumoral efficacy study, were fixed in a 4% paraformaldehyde solution for 5 min, rinsed three times with PBS 1× + 0.1% Triton™, and incubated for 1 h at room temperature with PBS 1× and 20% goat serum. Sections were incubated overnight at 4°C with anti-adenovirus-2/5 E1A [M73] antibody (Santa Cruz Biotechnology) diluted 1:50 in PBS 1× and 5% goat serum, rinsed with PBS 1× and 0.1% Triton™, and incubated for 1 h at room temperature with goat anti-rabbit igG (H+L) Secondary Antibody Alexa 633 (Invitrogen) diluted 1:200 in PBS 1× and 5% goat serum. Finally, sections were rinsed three times with PBS 1× and 0.1% Triton™, incubated with 100 ng/ml DAPI, rinsed with PBS 1×, and mounted using Vectashield® (Vector Laboratories). Images were visualized under a fluorescent microscope (Nikon Eclipse 50i), captured using a digital camera (Cool Cube1, MetaSystems), and processed with ImageJ v10.2 software.

**miRNA target genes identification analysis.** A list of potential target genes predicted by different algorithms (miRWalk, miRanda, miRDB, Pictar2, PITA, RNA22, and Targetscan) in the miRWalk database (<http://zmf.umm.uni-heidelberg.de/apps/zmf/mirwalk2/>) was obtained for miR-99b and miR-485. Each list was loaded into the GO enrichment analysis tool (<http://www.geneontology.org/page/go-enrichment-analysis>) and classified in terms of biological processes. The first commonly enriched GO term for both miRNAs was selected. From the genes belonging to that term, those predicted by at least 4 (miR-99b) or 5 (miR-485) prediction algorithms in the miRWalk database were selected for further study. miRNA target site scores were obtained from the microRNA.org database (miRDB algorithm) (<http://www.microrna.org/microrna/getMirnaForm.do>).

**Supplemental References:**

1. Anders S, Huber W. (2010). Differential expression analysis for sequence count data. *Genome Biol.* **11**:R106.
